# Supplementary material
Source: Springer Nature journal article supplement (https://www.springermedizin.de/resource/supplementary/13099_2012_78_MOESM5_ESM.pdf/9665504)

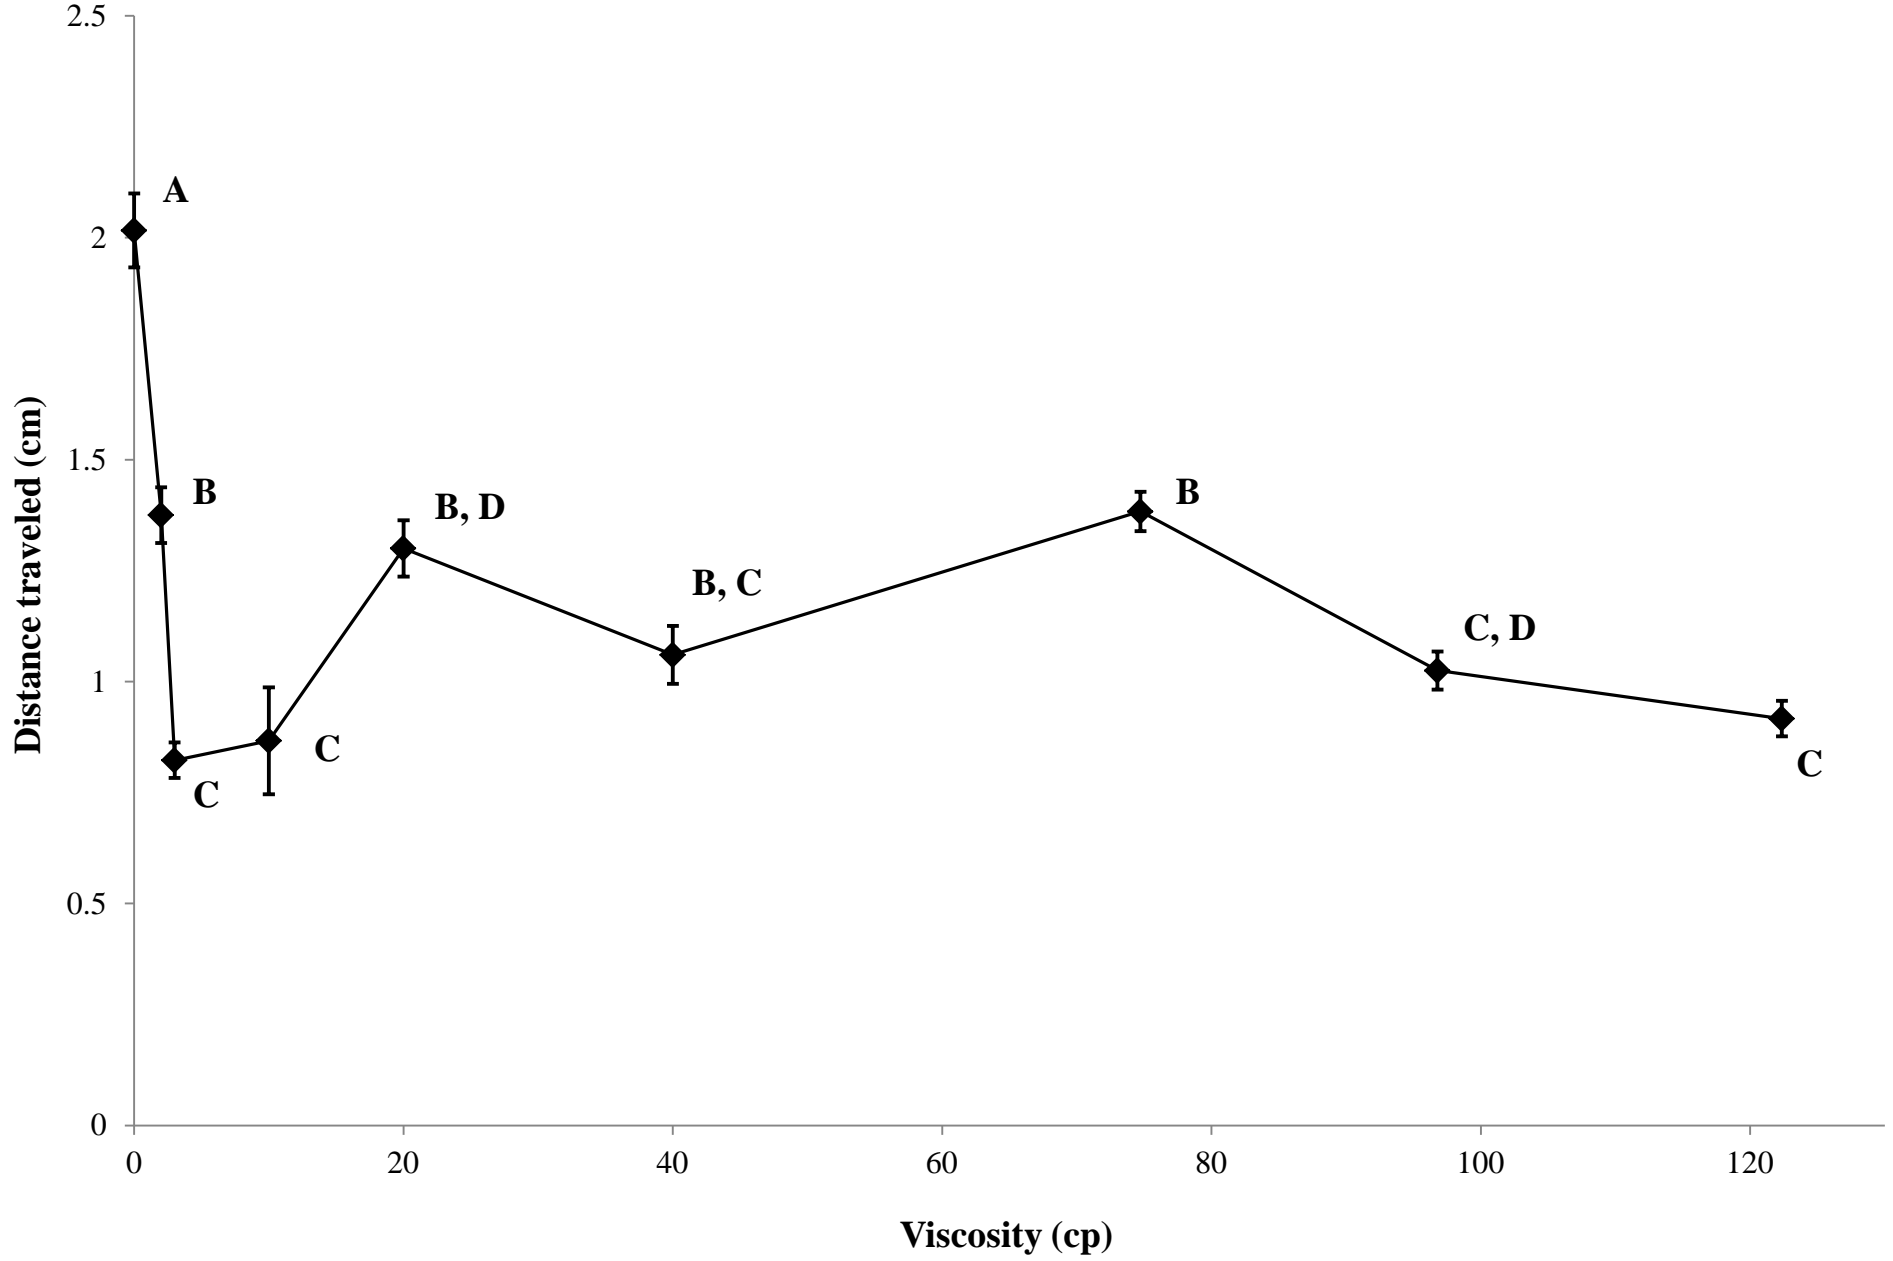

Supplement: MOESM5 [file 9665504]
